# Supplementary material for: Genome-Wide Identification and Expression Analysis of the VILLIN Gene Family in Soybean
Source: MDPI journal article supplement (doi:10.3390/plants12112101), 2023-05-25
Supplement: s1 [file s1]

**Supplementary Table S1.** Representative species-related information.

| Speices                           | villin family members | database         |
|-----------------------------------|-----------------------|------------------|
| <i>Porphyra umbilicalis v1.5</i>  | 0                     | Phytozome        |
| <i>Chlamydomonas reinhardtii</i>  | 0                     | Ensembl Plants   |
| <i>Ostreococcus lucimarinus</i>   | 0                     | Ensembl Plants   |
| <i>Marchantia polymorpha</i>      | 1                     | Ensembl Plants   |
| <i>Selaginella moellendorffii</i> | 2                     | Ensembl Plants   |
| <i>Amborella trichopoda</i>       | 3                     | Ensembl Plants   |
| <i>Aquilegia coerulea</i>         | 3                     | Phytozome        |
| <i>Vitis vinifera</i>             | 3                     | Ensembl Plants   |
| <i>Lotus japonicus</i>            | 5                     | Ensembl Plants   |
| <i>Vigna radiata</i>              | 5                     | Phytozome        |
| <i>Vigna unguiculata</i>          | 5                     | Ensembl Plants   |
| <i>Prunus persica</i>             | 3                     | Ensembl Plants   |
| <i>Arabidopsis thaliana</i>       | 5                     | Phytozome        |
| <i>Glycine max</i>                | 10                    | Phytozome        |
| <i>Medicago truncatula</i>        | 5                     | MtrunA17r5.0-ANR |
| <i>Pisum sativum</i>              | 5                     | Ensembl Plants   |
| <i>Oryza sativa</i>               | 5                     | Ensembl Plants   |
| <i>Zea mays</i>                   | 10                    | Phytozome        |

**Supplementary Table S2.** Characteristics analysis of the 20 conserved motifs in GmVLNs.

| name    | sequence                                            | length | E-value   | position prediction          |
|---------|-----------------------------------------------------|--------|-----------|------------------------------|
| motif1  | RSSLNHDDVFILDTZKNKIFQFNANGSSIQERAKALEVVQYJKEKYHEGKC | 50     | 1.9E-319  | Gelsolin domain 2            |
| motif2  | WJGKDTSQDEAGAAAIKTVELDAALGGRAVQYREIQGHESEKFLSYFKPC  | 50     | 2.90E-301 | Gelsolin domain 1            |
| motif3  | DPHLFSLSFSKGNLKVVEVYNFSQDDLLTEDILILDCHSEIFVWVGQQVD  | 50     | 2.10E-279 | Gelsolin domain 6            |
| motif4  | TKDLDPAFQGAGQKAGLEIWRIENFQPVVPKSSYGKFYTGDSYIILKTT   | 50     | 4.70E-271 | Gelsolin domain 1            |
| motif5  | TYNEEGVALFRIQGTSPDNMQAIQVDPVASSLNSTCYILQSGPTVFTWS   | 50     | 2.10E-263 | Gelsolin domain 5            |
| motif6  | KFJEHDALLEGLSPHVPJYIVTEGNEPPFFTRFFSWDHAKAMVLGNSFQR  | 50     | 4.60E-257 | Gelsolin domain 6            |
| motif7  | GDPVPGIDLTKREAYLSSEEFQEKFGMAKEAFYKLPWKQBKLKMAVDLF   | 50     | 1.20E-255 | Villin headpiece domain      |
| motif8  | LETNKCYYLDCGAEVFVWMGRNTSLEERKSASQAAEEFVAGGRPKSTRI   | 50     | 2.70E-244 | Gelsolin domain 3            |
| motif9  | PVEEPPPHJDCTGKJZVWRVNGQEKTLPAEDISKFYSGDCYIVQYTYTYP  | 50     | 1.10E-238 | Gelsolin domain 4            |
| motif10 | LASTMVESLKGPRPVQARIYEGKEPPQFHAILQPMIVLKGGLSSGYKKYIA | 50     | 1.80E-230 | Gelsolin domain 4            |
| motif11 | RIIZGYETVSFKSFDSPSGSAATVAEEGRGKVAALLKRQGMGVKGLTK    | 50     | 3.10E-192 | Gelsolin domain 5            |
| motif12 | EVAIVEDGKLMADSDSGEFWGLFGGFAPJPRKTIS                 | 41     | 4.90E-176 | Gelsolin domain 2            |
| motif13 | IIPLEGGVASGFKKPEEEEFETRLYVCRGKRVRVKZVPFA            | 41     | 1.80E-170 | Gelsolin domain 6            |
| motif14 | RDMSVGPDRGGPRGRAPALAAALAAAFESSNGTKLSTPPPSGRGLGPKRAA | 50     | 9.70E-145 | No putative conserved domain |
| motif15 | KPAKEGTESEQFWDALGGKQEYPSKKITR                       | 29     | 3.00E-101 | Gelsolin domain 5            |

|         |                                            |    |          |                              |
|---------|--------------------------------------------|----|----------|------------------------------|
| motif16 | GEDKEDYLJGTWFGKBSVEED                      | 21 | 1.60E-71 | Gelsolin domain 4            |
| motif17 | GNLCSAEDQZLVERMLDLJKP                      | 21 | 3.30E-57 | Gelsolin domain 5            |
| motif18 | REPLIPRSQKASPVTTPKSNPETSDEKGSVSSRIESLTIQED | 41 | 6.00E-43 | No putative conserved domain |
| motif19 | ETIPPKLYSIEKGEAEPVEGE                      | 21 | 5.60E-42 | Gelsolin domain 3            |
| motif20 | DEEEDNEGLAIYPYERLKTGS                      | 21 | 3.60E-41 | No putative conserved domain |

**Supplementary Table S3.** The qRT-PCR primer of *GmVLN*.

| Primer name | Forward/reverse | DNA sequence(5' → 3') |
|-------------|-----------------|-----------------------|
| GmVLN1a     | F               | CAAACCTGCTGGAGCAAACCC |
|             | R               | TGTCATACTGAGGAGGGCCA  |
| GmVLN1b     | F               | TGGCCCTCCTCAGTATGACA  |
|             | R               | ACTTCTGCGATTCTTGGCCT  |
| GmVLN2a     | F               | GCATTCCAGGGAGTTGGTCA  |
|             | R               | AAGCACCTCCTTTCCTTGT   |
| GmVLN2b     | F               | AGGTTCTTTTGCACGGTCT   |
|             | R               | GCCTTGGCTCTTTCCTGGAT  |
| GmVLN3a     | F               | GTCAAGCCTGTGGAAGGTGA  |
|             | R               | GCAACAACTCCTCAACGGC   |
| GmVLN3b     | F               | GCATTCCAGGGAGTTGGTCA  |
|             | R               | TGCCTCCTTTCCTTGTAGTT  |
| GmVLN4a     | F               | GCTGCAATGCTGGGAAACTC  |
|             | R               | AGACATGCTGCGAGAGGAAC  |
| GmVLN4b     | F               | GGATCCAGCTTTCAGGGAG   |
|             | R               | AATGGATGTCATGGCGCAGA  |
| GmVLN5a     | F               | GCCGGATTGGAATATGGCG   |
|             | R               | AGCACCAGCTTCATCCTGAC  |
| GmVLN5b     | F               | ATGCAGCTTTAGGAGGACGG  |
|             | R               | AGCCCCACCTTCTTGAGGTA  |
| ACT11       | F               | CGGTGGTTCTATCTTGGCATC |
|             | R               | GTCTTCGCTTCAATAACCCTA |

**Supplementary Table S4.** The relative expression of the *GmVLNs* gene in different lighting time treatments.

| Gene ID | Expression level of Lighting 7h | Expression level of Lighting 21h |
|---------|---------------------------------|----------------------------------|
| GmVLN1a | 0.5816                          | 0.6305                           |
| GmVLN1b | 0.7227                          | 0.9588                           |
| GmVLN2a | 0.6785                          | 1.595                            |

|         |        |       |
|---------|--------|-------|
| GmVLN2b | 1.002  | 1.445 |
| GmVLN3a | 1.274  | 1.678 |
| GmVLN3b | 0.9407 | 1.858 |
| GmVLN4a | 1.291  | 1.82  |
| GmVLN4b | 1.205  | 2.461 |
| GmVLN5a | 1.032  | 5.065 |
| GmVLN5b | 1.047  | 4.033 |

**Supplementary Table S5.** The relative expression level of the GmVLNs gene in different tissues.

| Gene ID | root        | stem        | leaf        | flower      | pod         | seed        | Axillary bud | SAM         |
|---------|-------------|-------------|-------------|-------------|-------------|-------------|--------------|-------------|
| GmVLN1a | 1.23599555  | 1.801893542 | 1.009042107 | 2.292032324 | 2.292032324 | 0.777285228 | 4.618500115  | 2.598006934 |
| GmVLN1b | 2.635237444 | 4.08410866  | 1.020285276 | 5.093981612 | 7.033282117 | 1.671556263 | 9.957339529  | 1.671556263 |
| GmVLN2a | 0.595176697 | 5.576134777 | 1.013730222 | 2.646420918 | 2.018824698 | 2.58117748  | 6.894693307  | 5.201506449 |
| GmVLN2b | 0.575021457 | 3.674517537 | 1.025594471 | 2.171814806 | 2.681385759 | 162.9812644 | 18.6925516   | 4.240826752 |
| GmVLN3a | 1.349918201 | 1.675662187 | 1.014025859 | 0.920477779 | 0.879214406 | 0.94430022  | 1.130355401  | 0.610218664 |
| GmVLN3b | 1.171722715 | 1.55394983  | 1.01642622  | 1.713999767 | 1.756973318 | 2.999626991 | 1.95339025   | 1.414577816 |
| GmVLN4a | 0.621945572 | 1.521998885 | 1.015001468 | 0.842609193 | 1.084265944 | 0.62664469  | 1.18188255   | 0.722932332 |
| GmVLN4b | 0.30090806  | 0.860676008 | 1.027280752 | 1.892686624 | 2.435501139 | 1.407582581 | 2.654769628  | 1.623865923 |
| GmVLN5a | 0.006076708 | 0.061545663 | 1.012658527 | 0.522462625 | 0.197004916 | 19.09358694 | 2.356563108  | 0.211363837 |
| GmVLN5b | 0.005666301 | 0.064885746 | 1.009042107 | 0.583047331 | 0.229410885 | 27.11691516 | 3.059741466  | 0.262549885 |

**Supplementary Table S6.** Predicted Soybean VLN interaction proteins and their scores.

| VLN protein | Interaction protein        | Score | VLN protein | Interaction protein        | Score |
|-------------|----------------------------|-------|-------------|----------------------------|-------|
| GmVLN1a     | GLYMA09G21600.2            | 0.612 | GmVLN1b     | GLYMA09G21600.2            | 0.612 |
|             | GLYMA08G10040.1            | 0.612 |             | GLYMA08G10040.1            | 0.612 |
|             | GLYMA07G00710.1            | 0.604 |             | GLYMA05G30150.1            | 0.548 |
|             | GLYMA05G30150.1            | 0.548 |             | GLYMA08G13310.2            | 0.548 |
|             | GLYMA08G13310.2            | 0.548 |             | GLYMA07G00710.1            | 0.604 |
|             | GLYMA06G10090.1            | 0.628 |             | GLYMA06G10090.1            | 0.628 |
|             | GLYMA07G15710.2            | 0.546 |             | GLYMA07G15710.2            | 0.546 |
|             | LOC547983(GLYMA04G10090.1) | 0.628 |             | LOC547983(GLYMA04G10090.1) | 0.628 |
|             | GLYMA05G27060.2            | 0.612 |             | GLYMA05G27060.2            | 0.612 |
|             | GLYMA12G31290.1            | 0.612 |             | GLYMA12G31290.1            | 0.612 |
|             | GLYMA09G21600.2            | 0.612 |             | GLYMA09G21600.2            | 0.612 |

|         |                            |       |         |                         |       |
|---------|----------------------------|-------|---------|-------------------------|-------|
|         | GLYMA08G10040.1            | 0.612 |         | GLYMA08G10040.1         | 0.612 |
|         | GLYMA07G00710.1            | 0.604 |         | GLYMA05G30150.1         | 0.548 |
|         | GLYMA05G30150.1            | 0.548 |         | GLYMA08G13310.2         | 0.548 |
| GmVLN2a | GLYMA13G20571.1            | 0.555 | GmVLN2b | GLYMA13G20571.1         | 0.555 |
|         | GLYMA02G29160.3            | 0.512 |         | GLYMA08G25673.1         | 0.603 |
|         | GLYMA15G04360.1            | 0.53  |         | GLYMA03G30110.2         | 0.512 |
|         | GLYMA03G30110.2            | 0.512 |         | GLYMA04G39380.3         | 0.512 |
|         | GLYMA19G26631.1            | 0.534 |         | GLYMA02G10170.1         | 0.512 |
|         | GLYMA16G05780.1            | 0.534 |         | GLYMA16G05780.1         | 0.534 |
|         | GLYMA13G41060.1            | 0.53  |         | GLYMA19G26631.1         | 0.534 |
|         | GLYMA04G39380.3            | 0.512 |         | GLYMA13G41060.1         | 0.53  |
|         | GLYMA02G10170.1            | 0.512 |         | GLYMA02G29160.3         | 0.512 |
|         | GLYMA08G25673.1            | 0.603 |         | GLYMA15G04360.1         | 0.53  |
|         | GLYMA13G20571.1            | 0.555 |         | GLYMA13G20571.1         | 0.555 |
|         | GLYMA02G29160.3            | 0.512 |         | GLYMA08G25673.1         | 0.603 |
| GmVLN3a | GLYMA13G20571.1            | 0.555 | GmVLN3b | GLYMA07G32300.2         | 0.594 |
|         | GLYMA08G25673.1            | 0.603 |         | GLYMA16G02650.2         | 0.594 |
|         | GLYMA03G30110.2            | 0.512 |         | MYB185(GLYMA19G44660.1) | 0.593 |
|         | GLYMA04G39380.3            | 0.512 |         | GLYMA19G37000.1         | 0.593 |
|         | GLYMA02G10170.1            | 0.512 |         | GLYMA13G11980.1         | 0.594 |
|         | GLYMA16G05780.1            | 0.534 |         | GLYMA13G32810.1         | 0.593 |
|         | GLYMA19G26631.1            | 0.534 |         | GLYMA13G24240.1         | 0.594 |
|         | GLYMA13G41060.1            | 0.53  |         | GLYMA08G10550.1         | 0.592 |
|         | GLYMA02G29160.3            | 0.512 |         | GLYMA07G03030.2         | 0.594 |
|         | GLYMA15G04360.1            | 0.53  |         | GLYMA08G25673.1         | 0.603 |
|         | GLYMA13G20571.1            | 0.555 |         | GLYMA07G32300.2         | 0.594 |
| GmVLN4a | GLYMA13G20571.1            | 0.555 | GmVLN4b | GLYMA13G20571.1         | 0.555 |
|         | GLYMA09G02870.1            | 0.548 |         | GLYMA09G02870.1         | 0.548 |
|         | GLYMA08G25673.1            | 0.691 |         | GLYMA15G13830.1         | 0.548 |
|         | GLYMA15G13830.1            | 0.548 |         | ?GLYMA14G35030.2        | 0.513 |
|         | GMMYB29B2(GLYMA20G35180.1) | 0.595 |         | ?GLYMA08G25673.1        | 0.691 |
|         | GLYMA09G06290.1            | 0.728 |         | GLYMA03G30110.2         | 0.512 |
|         | GLYMA08G42110.1            | 0.728 |         | GLYMA19G26631.1         | 0.534 |
|         | GLYMA09G06320.1            | 0.731 |         | GLYMA16G05780.1         | 0.534 |
|         | GLYMA16G25580.1            | 0.599 |         | GLYMA02G29160.3         | 0.512 |
|         | SHAT1-5(GLYMA16G02200.2)   | 0.599 |         | GLYMA02G10170.1         | 0.512 |
|         | GLYMA13G20571.1            | 0.555 |         | GLYMA13G20571.1         | 0.555 |
| GmVLN5a | GLYMA13G20571.1            | 0.555 | GmVLN5b | GLYMA13G20571.1         | 0.555 |
|         | GLYMA09G02870.1            | 0.548 |         | GLYMA15G13830.1         | 0.548 |
|         | GLYMA14G35030.2            | 0.513 |         | GLYMA09G02870.1         | 0.548 |
|         | GLYMA15G13830.1            | 0.548 |         | GLYMA14G35030.2         | 0.513 |
|         | GLYMA08G25673.1            | 0.691 |         | GLYMA08G25673.1         | 0.691 |
|         | GLYMA02G10170.1            | 0.512 |         | GLYMA03G30110.2         | 0.512 |
|         |                            |       |         |                         |       |

|  |                 |       |  |                 |       |
|--|-----------------|-------|--|-----------------|-------|
|  | GLYMA16G05780.1 | 0.534 |  | GLYMA02G10170.1 | 0.512 |
|  | GLYMA19G26631.1 | 0.534 |  | GLYMA19G26631.1 | 0.534 |
|  | GLYMA03G30110.2 | 0.512 |  | GLYMA16G05780.1 | 0.534 |
|  | GLYMA02G29160.3 | 0.512 |  | GLYMA02G29160.3 | 0.512 |

**Supplementary Table S7.** The interaction protein of GmVLN described.

| Gene ID         | Protein annotation                                   | Function annotation                          |
|-----------------|------------------------------------------------------|----------------------------------------------|
| GLYMA02G29160.3 | Uncharacterized protein; Belongs to the actin family | Cellular process                             |
| GLYMA13G41060.1 | Uncharacterized protein; Belongs to the actin family | Cellular process                             |
| GLYMA15G04360.1 | Uncharacterized protein; Belongs to the actin family | Cellular process                             |
| GLYMA13G20571.1 | Uncharacterized protein LOC100796414 isoform         | Acylphosphatase-like domain superfamily      |
| GLYMA02G10170.1 | Uncharacterized protein                              | Actin                                        |
| GLYMA19G26631.1 | Uncharacterized protein; Belongs to the actin family | Organelle organization                       |
| GLYMA16G05780.1 | Uncharacterized protein                              | Actin                                        |
| GLYMA08G25673.1 | Uncharacterized protein LOC100500688 isoform         | YchF, N-terminal                             |
| GLYMA03G30110.2 | Uncharacterized protein                              | Actin                                        |
| GLYMA04G39380.3 | Uncharacterized protein; Belongs to the actin family | Cellular process                             |
| GLYMA08G10040.1 | Myosin-binding protein 2                             | Binding                                      |
| GLYMA05G30150.1 | Uncharacterized protein                              | Zinc finger                                  |
| GLYMA08G13310.2 | Zinc finger transcription factor yy1 isoform x2      | Response to acid chemical                    |
| GLYMA07G00710.1 | Helicase ATP-binding domain-containing protein       | Cell cycle                                   |
| GLYMA07G15710.2 | Wuschel-related homeobox 3; Uncharacterized protein  | Cell differentiation                         |
| GLYMA06G10090.1 | Phosphatidylinositol 3-kinase                        | Membrane protein complex                     |
| GLYMA05G27060.2 | GTD-binding domain-containing protein                | Myosin-binding protein                       |
| GLYMA12G31290.1 | Uncharacterized protein                              | Cytoskeletal protein binding                 |
| GLYMA09G21600.2 | Myosin-binding protein 3 isoform                     | Myosin binding                               |
| LOC547983       | Phosphatidylinositol 3-kinase                        | Vacuole organization                         |
| GLYMA16G25580.1 | Dirigent protein                                     | Cellular aromatic compound metabolic process |
| SHAT1-5         | Uncharacterized protein                              | Transcription regulation                     |
| GLYMA09G02870.1 | Obg-like ATPase 1, Putative uncharacterized protein  | GTP binding domain                           |
| GLYMA15G13830.1 | Putative uncharacterized protein                     | Response to stress                           |
| GLYMA09G06290.1 | Uncharacterized protein                              | Regulation of biological process             |
| GMMYB29B2       | MYB/HD-like transcription factor                     | Response to stress                           |
| GLYMA09G06320.1 | Uncharacterized protein                              | Integral component of membrane               |
| GLYMA08G42110.1 | Uncharacterized protein                              | Cellular biosynthetic process                |
| GLYMA19G37000.1 | Belongs to the MIP/aquaporin (TC 1.A.8) family       | Transport                                    |
| MYB185          | MYB transcription factor MYB185                      | Tissue development                           |
| GLYMA16G02650.2 | Auxin response factor                                | AUX/IAA domain, and auxin binding            |
| GLYMA07G32300.2 | Auxin response factor                                | AUX/IAA domain                               |
| GLYMA13G11980.1 | Uncharacterized protein                              | Response to endogenous stimulus              |
| GLYMA07G03030.2 | Belongs to the MIP/aquaporin (TC 1.A.8) family       | Transport                                    |
| GLYMA13G32810.1 | Mads-box transcription factor, plant                 | Regulation of biological process             |
| GLYMA08G10550.1 | Uncharacterized protein                              | Transcription regulation                     |

|                 |                                                |                         |
|-----------------|------------------------------------------------|-------------------------|
| GLYMA13G24240.1 | Auxin response factor                          | Response to hormone     |
| GLYMA14G35030.2 | Belongs to the MIP/aquaporin (TC 1.A.8) family | Transmembrane transport |

**Supplementary Table S8.** Protein three-dimensional structure prediction parameters and usage models.

| Protein | GMQE | Coverage | Seq Identity | Template   |
|---------|------|----------|--------------|------------|
| GmVLN1a | 0.81 | 100%     | 94.71%       | I1N029.1.A |
| GmVLN1b | 0.81 | 100%     | 100.00%      | I1N029.1.A |
| GmVLN2a | 0.77 | 100%     | 84.65%       | K7K9D0.1.A |
| GmVLN2b | 0.77 | 100%     | 84.65%       | K7K9D0.1.A |
| GmVLN3a | 0.78 | 100%     | 100.00%      | K7K9D0.1.A |
| GmVLN3b | 0.78 | 100%     | 95.38%       | K7K9D0.1.A |
| GmVLN4a | 0.79 | 100%     | 82.08%       | K7LWU7.1.A |
| GmVLN4b | 0.78 | 100%     | 81.77%       | K7LWU7.1.A |
| GmVLN5a | 0.79 | 100%     | 95.10%       | K7LWU7.1.A |
| GmVLN5b | 0.79 | 100%     | 100.00%      | K7LWU7.1.A |

**Supplementary Table S9.** The raw transcription data of tissues of *GmVLN* Download in LIS (Legume Information System).

| Gene ID | Apical Meristem | Flower | Green Pods | Leaves | Nodule | Root Tip | Root  |
|---------|-----------------|--------|------------|--------|--------|----------|-------|
| GmVLN1a | 4.96            | 1.6    | 1.96       | 0.87   | 0.69   | 2.54     | 1.51  |
| GmVLN1b | 6.91            | 0.8    | 2.07       | 0.72   | 0.42   | 4.03     | 2.39  |
| GmVLN2a | 9.53            | 2.01   | 2.01       | 1.55   | 0.2    | 5.38     | 1.02  |
| GmVLN2b | 14.74           | 1.82   | 4.22       | 1.3    | 0.75   | 14.16    | 2.77  |
| GmVLN3a | 6.12            | 6.82   | 3.89       | 5.64   | 5.51   | 7.9      | 5.94  |
| GmVLN3b | 9.88            | 8.74   | 5.6        | 7.47   | 7.65   | 15.48    | 11.58 |
| GmVLN4a | 4.1             | 3.75   | 3.25       | 2.28   | 0.82   | 8.89     | 3.78  |
| GmVLN4b | 6.2             | 5.01   | 5.44       | 3.82   | 1.5    | 15.26    | 4.86  |
| GmVLN5a | 0.47            | 1.09   | 0          | 0.89   | 4.69   | 0.14     | 0.06  |
| GmVLN5b | 0.24            | 0.28   | 0          | 0.07   | 0.12   | 0.07     | 0     |

**Supplementary Table S10.** In q-RT detection, the Ct value of soybean VLN gene in various tissue.

| Gene ID          | root  | stem  | leaf  | flower | pod   | SAM   | axillary bud | seed  |
|------------------|-------|-------|-------|--------|-------|-------|--------------|-------|
| ACT11 Ct value   | 16.95 | 16.39 | 17.75 | 19.13  | 20.65 | 19.56 | 19.85        | 23.18 |
|                  | 16.73 | 16.44 | 17.44 | 19.11  | 20.44 | 19.61 | 19.76        | 23.29 |
|                  | 16.93 | 16.43 | 17.73 | 19.12  | 20.34 | 19.69 | 19.79        | 23.3  |
| GmVLN1a Ct value | 23.75 | 22.89 | 24.67 | 25.13  | 25.68 | 25.63 | 24.7         | 30.85 |
|                  | 23.71 | 22.84 | 24.78 | 25.16  | 25.65 | 25.64 | 24.7         | 30.97 |
|                  | 23.55 | 22.87 | 24.78 | 25.18  | 25.63 | 25.3  | 24.67        | 30.78 |
| GmVLN1b Ct value | 21.47 | 20.45 | 23.58 | 22.91  | 23.66 | 24.17 | 22.54        | 28.58 |
|                  | 21.46 | 20.36 | 23.92 | 22.93  | 23.62 | 24.43 | 22.54        | 28.57 |

|                  |       |       |       |       |       |       |       |       |
|------------------|-------|-------|-------|-------|-------|-------|-------|-------|
|                  | 21.56 | 20.71 | 23.62 | 22.87 | 23.65 | 24.26 | 22.55 | 28.61 |
| GmVLN2a Ct value | 24.45 | 20.63 | 24.39 | 24.78 | 26.2  | 24.17 | 23.85 | 28.91 |
|                  | 24.4  | 20.62 | 24.44 | 24.67 | 26.17 | 24.26 | 23.77 | 28.84 |
|                  | 24.51 | 20.78 | 24.51 | 24.66 | 26.32 | 24.15 | 23.88 | 28.8  |
| GmVLN2b Ct value | 23.79 | 20.36 | 23.86 | 24.24 | 25.49 | 23.64 | 21.65 | 22.02 |
|                  | 23.76 | 20.38 | 23.88 | 24.17 | 25.48 | 23.76 | 21.62 | 22.04 |
|                  | 23.76 | 20.53 | 23.65 | 24.24 | 25.45 | 23.72 | 21.69 | 22.03 |
| GmVLN3a Ct value | 21.51 | 20.8  | 22.73 | 24.55 | 25.71 | 25.8  | 24.72 | 28.42 |
|                  | 21.49 | 20.89 | 22.68 | 24.44 | 25.74 | 25.57 | 24.67 | 28.53 |
|                  | 21.65 | 20.88 | 22.89 | 24.49 | 25.72 | 25.61 | 24.78 | 28.44 |
| GmVLN3b Ct value | 21.81 | 20.97 | 22.59 | 23.69 | 24.77 | 24.17 | 23.97 | 26.8  |
|                  | 21.73 | 20.94 | 22.46 | 23.63 | 24.7  | 24.07 | 23.87 | 26.86 |
|                  | 21.57 | 20.96 | 22.58 | 23.57 | 24.6  | 24.26 | 23.8  | 26.79 |
| GmVLN4a Ct value | 22.42 | 20.71 | 22.24 | 24.25 | 25.25 | 25.07 | 24.47 | 28.84 |
|                  | 22.39 | 20.72 | 22.48 | 24.3  | 25.2  | 25.09 | 24.53 | 28.87 |
|                  | 22.29 | 20.65 | 22.38 | 24.26 | 25.07 | 25.07 | 24.53 | 28.87 |
| GmVLN4b Ct value | 24.58 | 22.79 | 23.85 | 24.3  | 20.65 | 25.07 | 24.01 | 28.84 |
|                  | 24.59 | 22.63 | 23.86 | 24.26 | 20.44 | 25.09 | 24.47 | 28.87 |
|                  | 24.61 | 22.77 | 23.38 | 24.42 | 20.34 | 25.07 | 24.53 | 28.8  |
| GmVLN5a Ct value | 30.82 | 26.94 | 23.93 | 26.32 | 29.06 | 28.21 | 24.69 | 25.3  |
|                  | 30.39 | 26.97 | 23.89 | 26.43 | 29.01 | 28.26 | 24.77 | 25.33 |
|                  | 30.56 | 26.71 | 23.94 | 26.31 | 29.09 | 28.27 | 24.76 | 25.24 |
| GmVLN5b Ct value | 31.58 | 27.38 | 24.67 | 27.11 | 29.59 | 28.93 | 25.34 | 25.72 |
|                  | 31.66 | 27.72 | 24.78 | 27.07 | 29.69 | 28.89 | 25.17 | 25.75 |
|                  | 31.83 | 27.78 | 24.78 | 27.08 | 29.59 | 28.89 | 25.43 | 25.73 |
